# Supplementary material
Source: ML conference proceedings conference paper supplement (https://openreview.net/forum?id=1G_WUgM1pnm)
Supplement: supplementary_material [file attachment]

● ● Original raining instances

→ → Reconstructed instance based on Gaussian noise  
without changing the label prediction

□ Discovered uncertain area

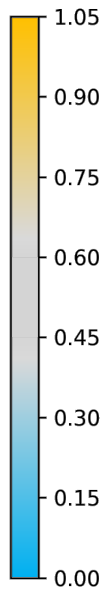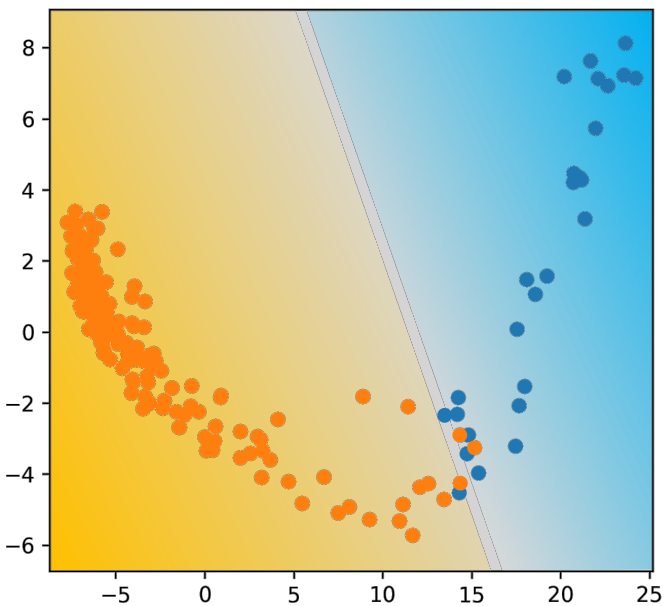

(a) Original representation and classification boundary.

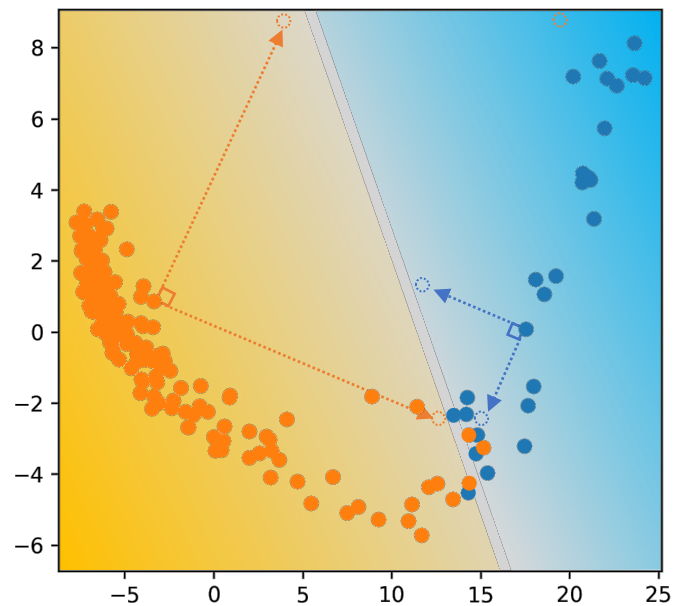

(b) Determine the uncertain area by VAE based reconstruction.

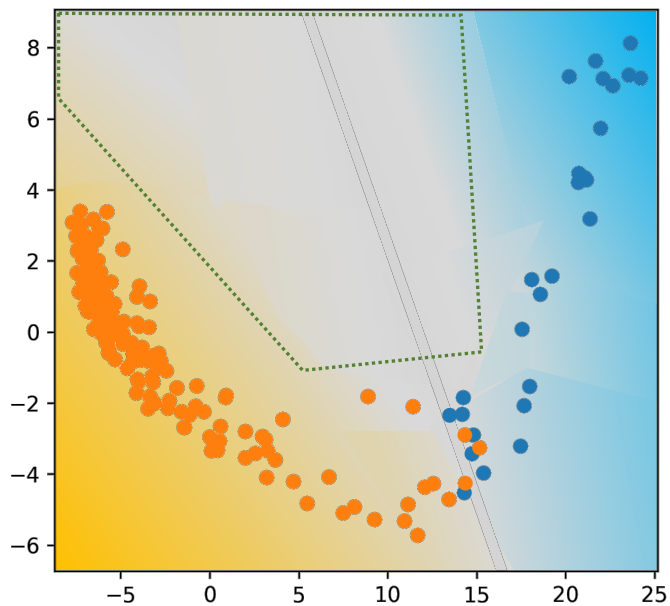

(c) Estimate the uncertainty for OOD area.
