# Supplementary material
Source: ML conference proceedings conference paper supplement (https://openreview.net/forum?id=1G_WUgM1pnm)

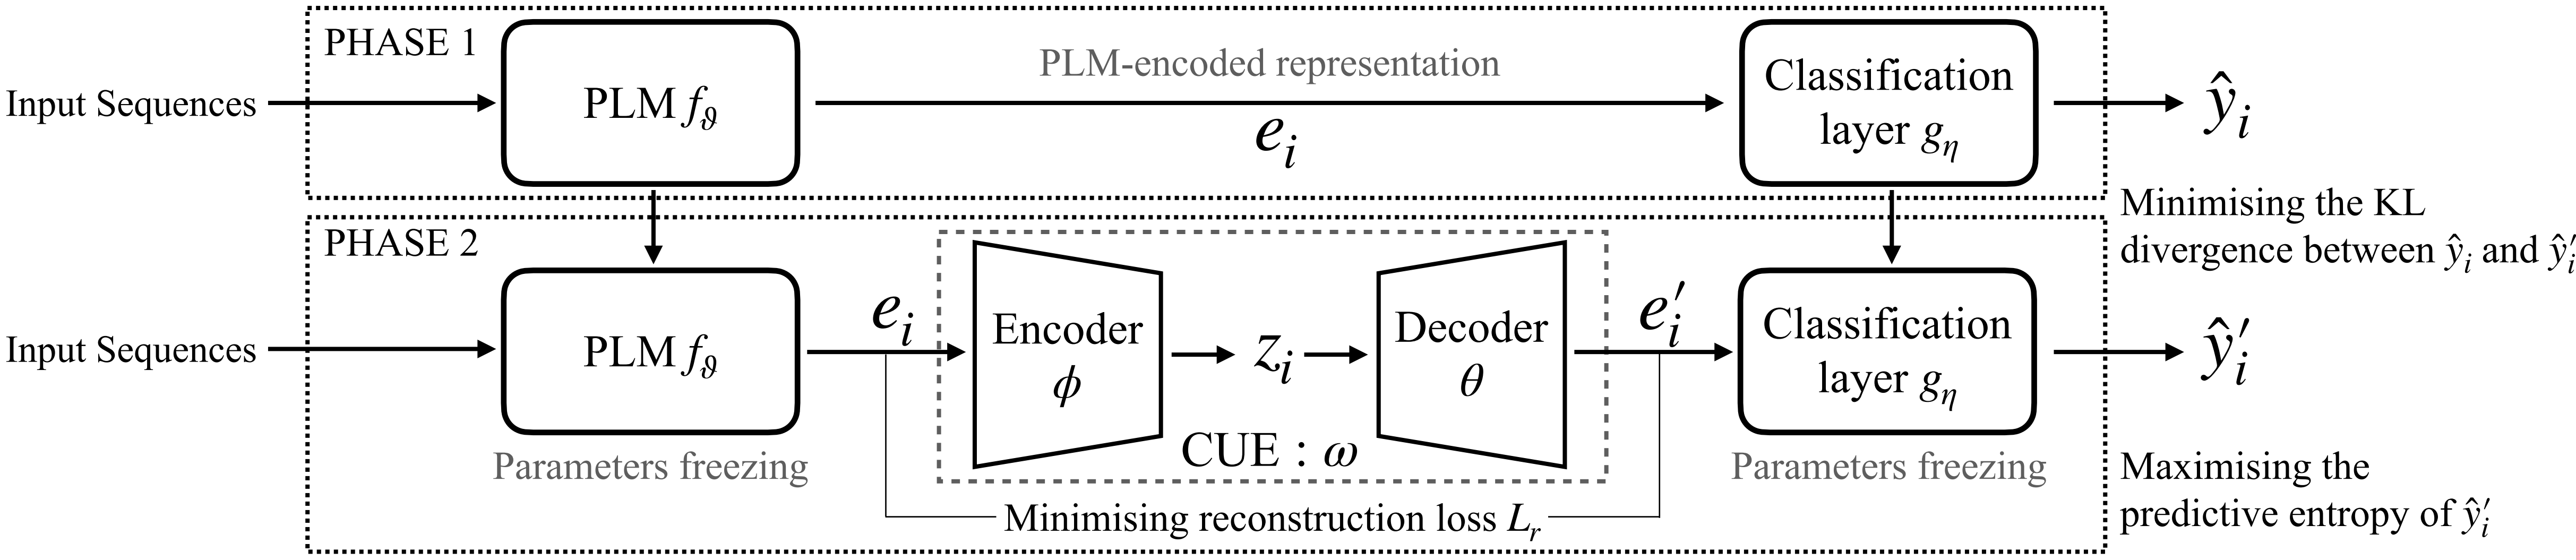

Supplement: supplementary_material [file attachment]

CoLA

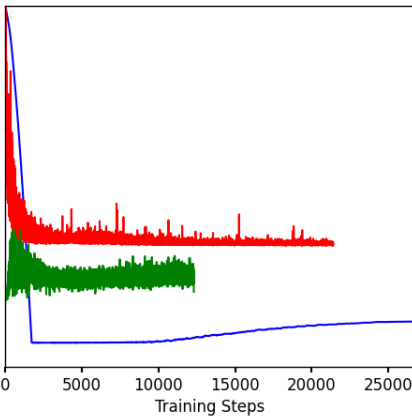

Go Emotions

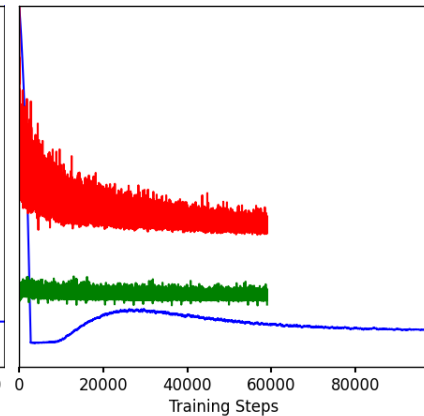

Emotion

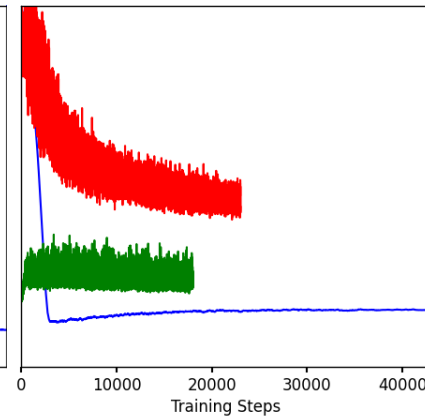

Multi NLI

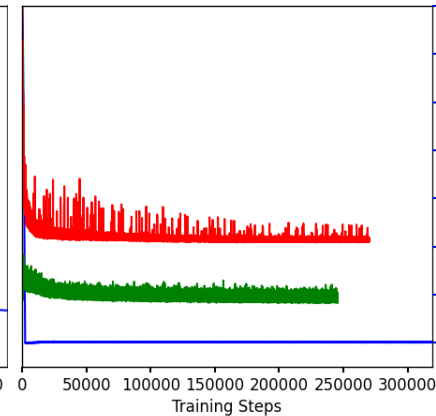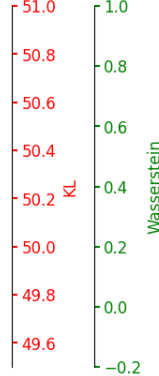

Supplement: supplementary_material [file attachment]
